# Supplementary material
Source: PubMed Central journal article supplement (PMC7028503)
Supplement: NIHMS1056561-supplement-2.pdf [file NIHMS1056561-supplement-2.pdf]

1 **Supplemental Material:**

2 **Supplemental Materials and Methods:**

3 **Media conditions for cell culture**

4 KCs were propagated in M154 medium supplemented with human KC growth supplement (Life  
5 Technologies/Thermo Fisher Scientific, Waltham, MA), 1,000 x gentamycin/amphotericin B solution  
6 (Life Technologies/Thermo Fisher), and 0.07 mM CaCl<sub>2</sub> (low calcium). Confluent KC monolayers  
7 were induced to differentiate by the addition of 1.2 mM CaCl<sub>2</sub> (high calcium) in M154 in the presence  
8 of human KC growth supplement and gentamycin/amphotericin B solution. MCs were cultured in  
9 OptiMEM (Life Technologies/Thermo Fisher) containing 1% penicillin/streptomycin (Corning,  
10 Corning, NY), 5% fetal bovine serum (Millipore Sigma, St. Louis, MO), 10 ng/ml bFGF (ConnStem  
11 Inc., Cheshire, CT), 1 ng/ml heparin (Millipore Sigma), 0.1 mM N<sup>6</sup>, 2'-O-dibutyryladenine 3:5-  
12 cyclic monophosphate (dbcAMP; Millipore Sigma), and 0.1 mM 3-isobutyl-1-methyl xanthine  
13 (IBMX; Millipore Sigma).

14

15 **Fixation and processing of organotypic cultures for imaging**

16 Organotypic cultures fixed in 10% neutral buffered formalin were embedded in paraffin blocks and  
17 cut into 4 μm sections. For indirect immunofluorescence microscopy, slides were baked at 60°C, de-  
18 paraffinized using xylene, dehydrated with ethanol, rehydrated in PBS and permeabilized by 0.5%  
19 Triton X-100 in PBS. Antigen retrieval was performed by incubation in 0.01 M Citrate buffer (pH  
20 6.0) at 95°C for 15 minutes. Sections were blocked in 1% BSA/2% Normal Goat Serum/PBS for 30  
21 minutes at 37°C. Primary antibody incubation was carried out overnight at 4°C in 1% BSA/2%  
22 Normal Goat Serum/PBS followed by washing in PBS. Secondary antibody incubation was carried  
23 out at 37°C for 45 minutes followed by washing in PBS. Sections were stained with 4',6-Diamidino-  
24 2-phenylindole (DAPI – Millipore Sigma) at a final concentration of 5 ng/μl at room temperature for  
25 2 minutes followed by washing in PBS. Cover slips were mounted on the sections with ProLong Gold  
26 Antifade Reagent (Life Technologies/Thermo Fisher).

27 For whole mount imaging: Six days after lifting to the air-liquid interface, the epidermal equivalent  
28 layer was removed from the collagen plug and fixed in 4% paraformaldehyde in PBS for 15 min on  
29 ice. Samples were then washed three times in PBS for 5 min each at room temperature.

30 Subsequently, samples were incubated in blocking buffer (1% Triton-X 100 with 5% goat serum in  
31 PBS) for 1 hr at 37°C followed by incubation overnight at 37°C with S100 (ab52642, anti-S100  
32 beta; Abcam, Cambridge, UK) diluted 1:100 in blocking buffer. Samples were washed 3 times for  
33 10 min each with PBS at room temperature and then incubated overnight at 37°C with Alexa Fluor-

34 conjugated secondary antibodies (1:250) in blocking buffer that included DAPI (2  $\mu$ g/ml). Samples  
35 were washed 3 times for 10 min each with PBS at room temperature and mounted onto glass slides  
36 with Prolong Gold Antifade Reagent.

### 37 **Quantitative real-time PCR**

38 RNA was isolated from KCs and MCs using the RNeasy Mini Kit (Qiagen, Valencia, CA),  
39 according to the manufacturer's instructions. MCs were grown in monoculture prior to being  
40 incubated for 7 days with either MC media alone or with a 1:1 mixture of MC media and  
41 conditioned media. Total RNA concentrations were equalized between samples and cDNA was  
42 prepared using the Superscript III First Strand Synthesis Kit (Life Technologies/Thermo Fisher).  
43 Quantitative PCR was performed using SYBR Green PCR master mix (Life Technologies/Thermo  
44 Fisher) and gene-specific primers (Supplemental Table 1) in a StepOnePlus instrument (Thermo  
45 Fisher Scientific Applied Biosystems). Calculations for relative mRNA levels were performed using  
46 the  $\Delta\Delta$ Ct method, normalized to GAPDH.

47

### 48 **MTT assay and cell counting**

49 MCs were plated at 5000 cells/well in 96 well plates and the next day conditioned media diluted 1:1  
50 in MC media was added. The MTT assay protocol (Abcam), which was followed according to the  
51 manufacturer's instructions, is based on the conversion of water soluble MTT (3-(4,5-  
52 dimethylthiazol-2-yl)-2,5-diphenyltetrazolium bromide) compound to an insoluble formazan  
53 product by viable cells. MC viability was assayed 1 day and 7 days after initiating incubation in  
54 conditioned media diluted 1:1 in MC media. On days 1 and 7, MCs were incubated for 3 hours with  
55 MTT reagent and 15 minutes with MTT solvent and absorbance at 590nm was measured with an  
56 ELx800 microplate reader (Bio-Tek Instruments, Inc). Cells were also counted on days 0, 1, and 3  
57 after initiating incubation in conditioned media using a hemocytometer.

58

### 59 **Immunoblot analysis of proteins**

60 Whole cell lysates were collected from confluent monolayers of KCs or 80% confluent MCs in urea-  
61 SDS buffer (8 M urea/1% SDS/60 mM Tris (pH 6.8)/5%  $\beta$ -mercaptoethanol/10% glycerol) and  
62 sonicated. Samples separated by SDS-PAGE were transferred to nitrocellulose, blocked in 5%  
63 milk/PBS, and incubated with primary antibodies in milk/PBS for 1 hour at room temperature or  
64 overnight at 4°C. After PBS washes, secondary antibodies diluted in milk/PBS were added to blots.  
65 Protein bands were visualized using exposure to X-ray film. Densitometric analyses were performed  
66 of scanned immunoblots using ImageJ software.

67

68 **Antibodies**

69 Mouse monoclonal antibodies: P124 (anti-Dsg1 extracellular domain; Progen, Heidelberg,  
70 Germany) and 27B2 (anti-Dsg1 cytodomain; Life Technologies/Thermo Fisher). Rabbit monoclonal  
71 antibody EP1576Y (ab52642, anti-S100 beta; Abcam, Cambridge, UK). Rabbit polyclonal  
72 antibodies: Flag (Cell Signaling Technologies), TYRP1 (ab83774; Abcam), and GAPDH (G9545,  
73 glyceraldehyde-3-phosphate dehydrogenase; Millipore Sigma). Secondary antibodies for  
74 immunoblotting were goat anti-mouse and goat anti-rabbit peroxidase (SeraCare Life Sciences,  
75 Milford, MA). Secondary antibodies for immunofluorescence were goat anti-mouse and goat-anti-  
76 rabbit linked to fluorophores of 488 and 568 nm (Alexa Fluor; Life Technologies/Thermo Fisher).

## 78 Supplemental Table 1. Primers used in this study.

| <u>Target</u> | <u>Primers</u>                                                           |
|---------------|--------------------------------------------------------------------------|
| Dsg1          | F: 5'-TCCATAGTTGATCGAGAGGTCAC-3'<br>R: 5'-CTGCGTCAGTAGCATTGAGTATC-3'     |
| Dsg3          | F: 5'-ATCAATGCAACAGATGCAGATGA-3'<br>R: 5'-TGTCAAAGTGTAGCTGCTGTGT-3'      |
| IL1 $\alpha$  | F: 5'-AGTAGCAACCAACGGGAAGG-3'<br>R: 5'-TGGTTGGTCTTCATCTTGGG-3'           |
| IL1 $\beta$   | F: 5'-GCAAGGGCTTCAGGCAGGCCGCG-3'<br>R: 5'-GGTCATTCTCCTGGAAGGTCTGTG-3'    |
| IL2           | F: 5'-GTCACAAACAGTGCACCTAC-3'<br>R: 5'-CCCTGGGTCTTAAGTGAAAG-3'           |
| IL4           | F: 5'-ACTTTGAACAGCCTCACAGAG-3'<br>R: 5'-TTGGAGGCAGCAAAGATGTC-3'          |
| IL6           | F: 5'- ACAGCCACTCACCTCTTCAG -3'<br>R: 5'- CCATCTTTTTTCAGCCATCTTT -3'     |
| IL8           | F: 5'- ATGACTTCCAAGCTGGCCGT -3'<br>R: 5'- TCCTTGGCAAAACTGCACCT -3'       |
| IL10          | F: 5'- GGTTGCCAAGCCTTGTCTGA -3'<br>R: 5'- AGGGAGTTCACATGCGCCT -3'        |
| IL19          | F: 5'- GAGCCATCCAAGCTAAGGACA -3'<br>R: 5'- CTTGGTCACGCAGCACACAT -3'      |
| IL23          | F: 5'- GCTTCAAATCCTTCGCAG -3'<br>R: 5'- TATCTGAGTGCCATCCTTGAG -3'        |
| CXCL1         | F: 5'- AACCGAAGTCATAGCCACAC -3'<br>R: 5'- GTTGGATTTGTCAGTTCAGC -3'       |
| TNF $\alpha$  | F: 5'- ATGAGCACTGAAAGCATGATCC -3'<br>R: 5'- GAGGGCTGATTAGAGAGAGGTC -3'   |
| IFN $\gamma$  | F: 5'- CTAATTATTCGGTAACTGACTTGA -3'<br>R: 5'- ACAGTTCAGCCATCACTTGGGA -3' |
| POMC          | F: 5'- AGGCACTTGCTGGATTCTCC -3'                                          |

|       |                                                                                |
|-------|--------------------------------------------------------------------------------|
|       | R: 5'-GCCCTTCTTGTAGGCGTTCT-3'                                                  |
| KITL  | F: 5'-TCGATGACCTTGTGGAGTGC-3'<br>R: 5'-TGCTGTCATTCCCTAAGGGAGC-3'               |
| END-1 | F: 5'-GACATCATTTGGGTCAACACTC-3'<br>R: 5'-GGCATCTATTTTCACGGTCTGT-3'             |
| MITF  | F: 5'-TTATAGTACCTTCTCTTTGCCAGTCC-3'<br>R: 5'-CTTATAAAATCCCTCTTTTTCACAGTTGGA-3' |
| MC1R  | F: 5'-ACTTCTCACCAGCAGTCGTG-3'<br>R: 5'-CATTGGAGCAGACGGAGTGT-3'                 |
| TYRP1 | F: 5'-GTGCCACTGTTGAGGCTTTG-3'<br>R: 5'-ATGGGGATACTGAGGGCTGT-3'                 |
| GAPDH | F: 5'-ACCACAGTCCATGCCATCAC-3'<br>R: 5'-TCCACCACCCTGTTGCTGTA-3'                 |

79

80 Dsg1, Desmoglein 1; Dsg3, Desmoglein 3; IL, Interleukin, CXCL1, Chemokine ligand 1; TNF,  
81 Tumor Necrosis Factor; IFN, Interferon; POMC, Pro-opiomelanocortin; MITF, Melanogenesis  
82 associated transcription factor; MC1R, Melanocortin 1 receptor; TYRP1, Tyrosinase related protein  
83 1; KITL, Kit ligand; END-1, Endothelin-1; GAPDH, Glyceraldehyde 3-phosphate dehydrogenase.

84

85

### Histogram of Branch Points

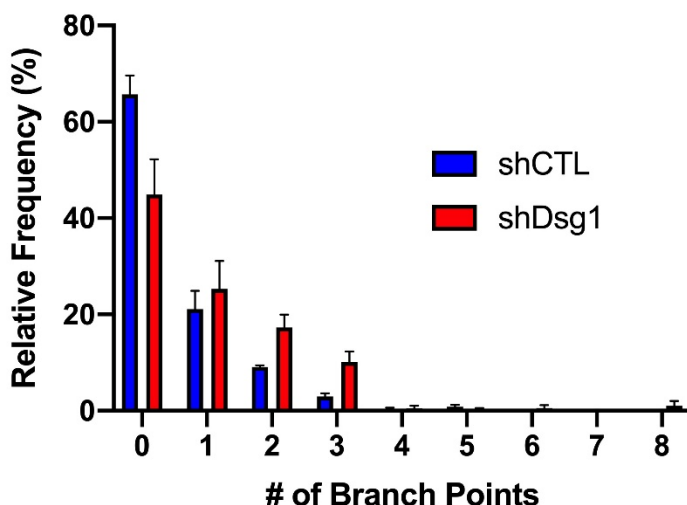

96 Supplemental Figure 1. *MCs in Dsg1-deficient organotypic cultures exhibit increased dendrite*  
 97 *branching compared to controls.* Histogram of the frequency of occurrence of 0, 1, 2, 3, 4, 5, 6, 7,  
 98 and 8 branch points per cell. The average number of branch points per cell are presented graphically  
 99 in Figure 1F. There were fewer occurrences of 0 MC dendrite branch points and more occurrences of  
 100 2 and 3 branch points in the Dsg1-depleted organotypic cultures compared to the controls. A total of  
 101 239 MCs were analyzed for shCTL samples and 204 MCs for shDsg1 samples across all images  
 102 (around 50 cells per organotypic culture). Data are presented as mean (N=4 independent experiments)  
 103 and SEM.

104

105

106

107

108

109

110

111

112

113

114

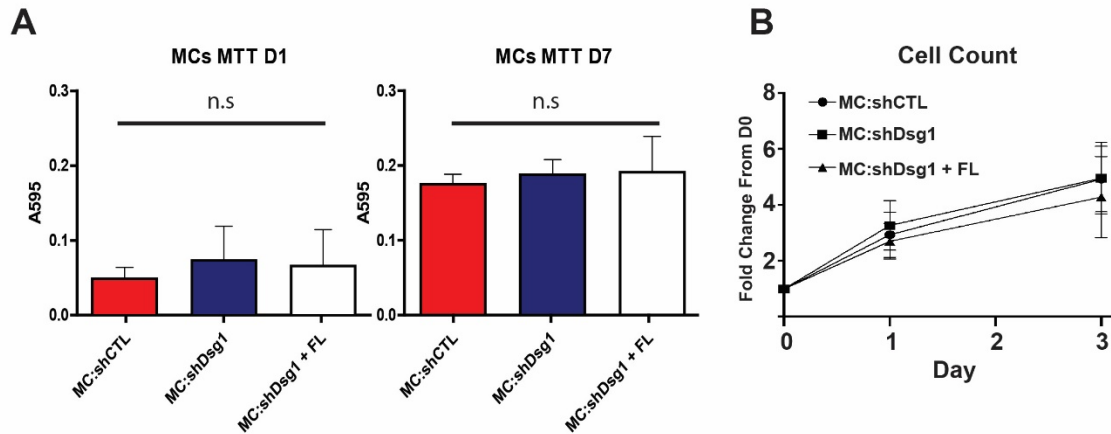

115

116 **Supplemental Figure 2. MCs are viable and have similar growth curves when grown in**  
117 **conditioned media from control, Dsg1-deficient, and Dsg1-deficient rescued with full length Dsg1**  
118 **KCs. (A)** The MTT assay was conducted on MCs 1 day or 7 days after incubation in 1:1 mixture of  
119 MC media: KC conditioned media (MC:shCTL, MC:shDsg1, MCLshDsg1 + FL). No significant  
120 changes were observed in cell viability at either time point regardless of type of conditioned media  
121 (One Way ANOVA, repeated measures, Tukey's post-hoc test, N=3 MC isolates, 1 KC conditioned  
122 media, bar graph represents mean and SEM). **(B)** MCs (3 MC isolates) were counted using a  
123 hemocytometer on days 1, 2, and 3 after incubation in 1:1 MC:KC conditioned media. Fold changes  
124 from day 0 were calculated and represented as the mean and SEM of the 3 MC isolates treated with  
125 1 set of KC conditioned media (MC:shCTL, MC:shDsg1, MC:shDsg1 + FL).

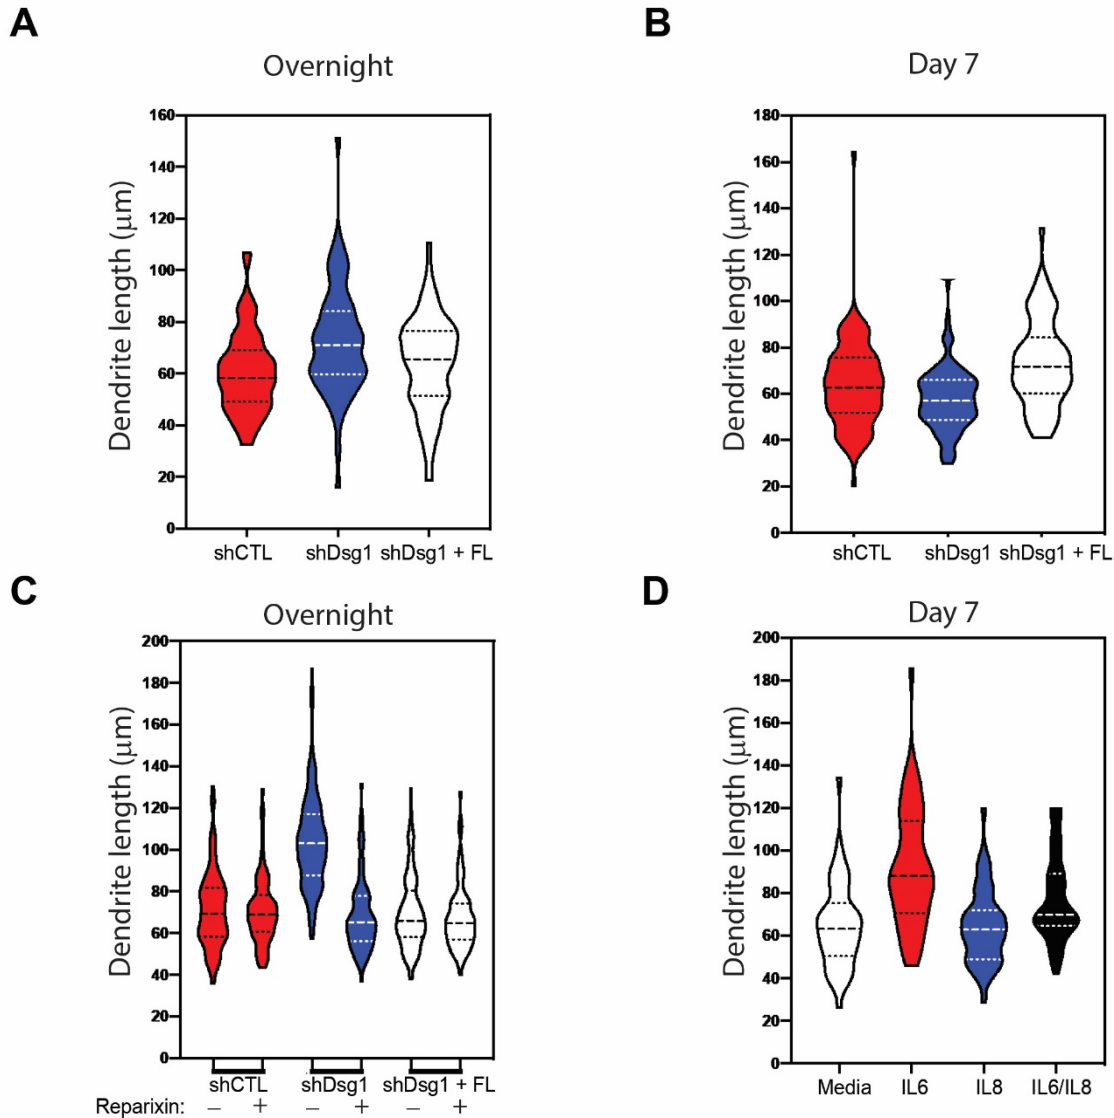

126

127 Supplemental Figure 3. *Dsg1*-deficient KCs change MC dendricity, partially dependent upon  
 128 cytokine/chemokine signaling. **A**) Violin plots of the spread of dendrite lengths of all cells after  
 129 overnight incubation in media conditioned by KCs infected with shCTL, shDsg1, or shDsg1 + FL-  
 130 expressing viruses. Incubation with media from KCs depleted of Dsg1 resulted in dendrite  
 131 lengthening compared to shCTL, as shown in Figure 4B. N = 5 independent MC:KC pairs. **B**) Violin  
 132 plots as in A except after 7 days of incubation in media conditioned by KCs expressing shCTL,  
 133 shDsg1, or shDsg1 + FL. Incubation with media from KCs depleted of Dsg1 resulted in dendrite  
 134 shortening compared to the other two treatment groups, as shown in Figure 4C. N = 5 independent  
 135 MC:KC pairs. **C**) Violin plots of dendrite lengths after overnight incubation in media conditioned by



136 KCs expressing shCTL or shDsg1 with and without treatment with the CXCL1/IL8 receptor inhibitor,  
137 reparixin. While media from Dsg1-depleted KCs resulted in lengthened MC dendrites as in A,  
138 treatment with reparixin blocked the effect, as shown in Figure 4D. N = 3 independent experiments.  
139 **D)** Violin plots of dendrite lengths from MCs treated for 7 days with media spiked with recombinant  
140 IL6, IL8, or the combination of IL6/IL8. Exposure to IL6 resulted in increased dendrite length as  
141 shown in Figure 4E. N = 3 independent experiments. Dotted lines inside violin plots represent means  
142 and SEM of all data points.
